# Supplementary material
Source: Springer Nature journal article supplement (https://www.springermedizin.de/resource/supplementary/12874_2012_991_MOESM6_ESM.pdf/9433018)
Supplement: MOESM6 [file 9433018]

|                     | Ideology of CCTH                                                                                                                                                                                         | Patient-centred approach                                                                                                                                             | Equity in service provision                                                                                                                | Equivalence to hospital care                                                                                                              |
|---------------------|----------------------------------------------------------------------------------------------------------------------------------------------------------------------------------------------------------|----------------------------------------------------------------------------------------------------------------------------------------------------------------------|--------------------------------------------------------------------------------------------------------------------------------------------|-------------------------------------------------------------------------------------------------------------------------------------------|
| <b>Manager 1</b>    | Gen Paeds doesn't need to be in hospital; with right infrastructure CCTH <u>makes sense</u> [p1, 24].                                                                                                    | Need to deliver services based on what families need; at the moment <u>focused on what's easier for us</u> <b>QQQ</b> [p16, 467].                                    | For some people a city centre hospital is CTH than a clinic in the community [p620, 21].                                                   | Need to <u>instil confidence</u> that they're getting same level of care, but CTH [p2, 33].                                               |
| <b>Consultant 7</b> | CCTH is a good recommendation; only patients who need specific investigations should attend hospital for outpatients [p1, 7].                                                                            | <u>Preservation of the institution (hospital), rather than needs of the population they actually serve, seems to be the predominant interest</u> <b>QQ</b> [p3, 69]. |                                                                                                                                            | <u>Make it clear to patients it's exactly same</u> service in satellite clinic, <u>they are seeing me</u> (same consultant) [page 1, 16]. |
| <b>Executive 5</b>  | The more we keep patients out of hospital, the better; don't want patients in hospital if don't need to [p1, 14]. CCTH is part of <u>bigger picture around self care and self management</u> [p11, 350]. |                                                                                                                                                                      | If just transfer clinic from hospital to community setting, <u>improve access for some, but reduce it for others</u> <b>QQ</b> [p11, 340]. |                                                                                                                                           |
